# Supplementary material for: Genome bias influences amino acid choices: analysis of amino acid substitution and re-compilation of substitution matrices exclusive to an AT-biased genome
Source: PubMed Central journal article supplement — Nucleic Acids Res. 2008 Oct 23;36(21):6664–75. doi: 10.1093/nar/gkn635 (PMC2588515; doi:10.1093/nar/gkn635), 2008-10-23
Supplement: gkn635_1.pdf [file gkn635_1.pdf]

**Table S1. Similarity index of PfFSmat60 and Blosum50 (comparison of odd ratios)**

|   | A            | R            | N            | D            | C            | Q            | E            | G            | H            | I            | L            | K            | M            | F            | P            | S            | T            | W            | Y            | V            |
|---|--------------|--------------|--------------|--------------|--------------|--------------|--------------|--------------|--------------|--------------|--------------|--------------|--------------|--------------|--------------|--------------|--------------|--------------|--------------|--------------|
| A | <b>1.661</b> | 0.218        | 0.158        | 0.181        | 0.788        | 0.241        | 0.175        | 0.469        | 0.114        | 0.181        | 0.230        | 0.148        | 0.315        | 0.208        | 0.463        | 0.459        | 0.403        | 0.223        | 0.140        | 0.460        |
| R | 0.320        | <b>1.495</b> | 0.207        | 0.183        | 0.255        | 0.338        | 0.237        | 0.189        | 0.292        | 0.155        | 0.212        | 0.288        | 0.274        | 0.137        | 0.245        | 0.292        | 0.310        | 0.123        | 0.122        | 0.168        |
| N | 0.607        | 0.666        | <b>0.659</b> | 0.609        | 0.318        | 0.723        | 0.557        | 0.683        | 0.473        | 0.160        | 0.404        | 0.460        | 0.356        | 0.366        | 0.518        | 0.529        | 0.484        | 0.435        | 0.286        | 0.419        |
| D | 0.430        | 0.370        | 0.292        | <b>0.850</b> | 0.253        | 0.525        | 0.624        | 0.327        | 0.345        | 0.128        | 0.224        | 0.282        | 0.308        | 0.255        | 0.421        | 0.429        | 0.326        | 0.242        | 0.190        | 0.231        |
| C | 1.917        | 0.572        | 0.517        | 0.502        | <b>0.725</b> | 0.303        | 0.412        | 0.559        | 0.558        | 0.678        | 0.670        | 0.196        | 0.717        | 0.417        | 0.407        | 0.970        | 0.748        | 0.567        | 0.495        | 0.961        |
| Q | 0.598        | 0.535        | 0.390        | 0.464        | 0.252        | <b>1.472</b> | 0.516        | 0.353        | 0.424        | 0.243        | 0.291        | 0.376        | 0.416        | 0.267        | 0.423        | 0.367        | 0.491        | 0.179        | 0.154        | 0.336        |
| E | 0.604        | 0.394        | 0.304        | 0.551        | 0.268        | 0.549        | <b>0.916</b> | 0.307        | 0.339        | 0.203        | 0.271        | 0.313        | 0.380        | 0.203        | 0.392        | 0.393        | 0.345        | 0.144        | 0.137        | 0.346        |
| G | 0.507        | 0.220        | 0.169        | 0.197        | 0.302        | 0.149        | 0.214        | <b>0.962</b> | 0.168        | 0.089        | 0.114        | 0.133        | 0.188        | 0.118        | 0.263        | 0.265        | 0.165        | 0.094        | 0.077        | 0.156        |
| H | 0.576        | 0.485        | 0.241        | 0.444        | 0.275        | 0.562        | 0.371        | 0.342        | <b>1.068</b> | 0.149        | 0.269        | 0.250        | 0.286        | 0.279        | 0.360        | 0.365        | 0.378        | 0.490        | 0.302        | 0.380        |
| I | 0.559        | 0.500        | 0.207        | 0.241        | 0.522        | 0.502        | 0.328        | 0.185        | 0.255        | <b>0.668</b> | 0.516        | 0.316        | 0.745        | 0.335        | 0.366        | 0.258        | 0.403        | 0.440        | 0.191        | 0.782        |
| L | 0.501        | 0.413        | 0.230        | 0.236        | 0.484        | 0.471        | 0.308        | 0.151        | 0.226        | 0.345        | <b>0.915</b> | 0.308        | 0.738        | 0.387        | 0.409        | 0.261        | 0.297        | 0.265        | 0.185        | 0.484        |
| K | 0.638        | 0.820        | 0.370        | 0.426        | 0.350        | 0.633        | 0.473        | 0.399        | 0.419        | 0.270        | 0.357        | <b>0.700</b> | 0.378        | 0.236        | 0.547        | 0.465        | 0.470        | 0.361        | 0.187        | 0.455        |
| M | 0.388        | 0.295        | 0.202        | 0.232        | 0.341        | 0.311        | 0.371        | 0.115        | 0.162        | 0.417        | 0.530        | 0.261        | <b>1.908</b> | 0.415        | 0.182        | 0.252        | 0.367        | 0.225        | 0.181        | 0.514        |
| F | 0.478        | 0.280        | 0.189        | 0.218        | 0.425        | 0.318        | 0.207        | 0.247        | 0.384        | 0.286        | 0.496        | 0.173        | 0.669        | <b>0.907</b> | 0.386        | 0.268        | 0.277        | 0.715        | 0.444        | 0.399        |
| P | 0.574        | 0.362        | 0.192        | 0.257        | 0.243        | 0.281        | 0.186        | 0.165        | 0.211        | 0.143        | 0.203        | 0.180        | 0.200        | 0.141        | <b>1.048</b> | 0.387        | 0.229        | 0.195        | 0.102        | 0.325        |
| S | 1.038        | 0.381        | 0.316        | 0.440        | 0.547        | 0.403        | 0.384        | 0.455        | 0.400        | 0.180        | 0.250        | 0.270        | 0.487        | 0.212        | 0.604        | <b>1.072</b> | 0.617        | 0.474        | 0.153        | 0.312        |
| T | 0.655        | 0.450        | 0.264        | 0.340        | 0.426        | 0.525        | 0.313        | 0.290        | 0.301        | 0.206        | 0.243        | 0.252        | 0.394        | 0.224        | 0.450        | 0.584        | <b>1.297</b> | 0.148        | 0.168        | 0.384        |
| W | 0.223        | 0.429        | 0.307        | 0.172        | 0.141        | 0.179        | 0.079        | 0.140        | 0.445        | 0.162        | 0.169        | 0.054        | 0.490        | 0.546        | 0.072        | 0.194        | 0.178        | <b>1.330</b> | 0.343        | 0.232        |
| Y | 0.504        | 0.369        | 0.260        | 0.288        | 0.289        | 0.279        | 0.296        | 0.207        | 0.416        | 0.210        | 0.341        | 0.250        | 0.478        | 0.580        | 0.520        | 0.341        | 0.317        | 0.696        | <b>0.754</b> | 0.320        |
| V | 0.637        | 0.352        | 0.197        | 0.212        | 0.579        | 0.372        | 0.313        | 0.220        | 0.380        | 0.400        | 0.375        | 0.247        | 0.511        | 0.254        | 0.377        | 0.290        | 0.430        | 0.239        | 0.146        | <b>1.219</b> |

Each element of the table is a ratio of the odd ratios of PfFSmat60 and Blosum50 substitution matrices, a measure of similarity of the two matrices. The text highlighted in bold are the diagonal elements.

**Table S2. Alignment scores of the PFB0090C protein of *Plasmodium falciparum* and human DnaJ homolog, Q9UDY4, with PfSSM series of matrices**

| Clustering % | Smat           | SSmat        | PfFmat       | PfFSmat     |
|--------------|----------------|--------------|--------------|-------------|
| 50           | 235.8 (338)    | 142.7 (339)  | 199.6 (346)  | 53.5 (343)  |
| 60           | 235.9 (348)    | 148.0 (339)  | 203.5* (346) | 53.0 (343)  |
| 70           | 236.8 (348)    | 148.0 (339)  | 201.4 (346)  | 54.8 (343)  |
| 80           | 238.9* † (348) | 151.9 (339)  | 196.2 (337)  | 57.7 (343)  |
| 90           | 230.2 (348)    | 179.4* (339) | 183.0 (346)  | 62.5* (340) |

Smat = Symmetric matrix; SSmat = Symmetric Scaled matrix; PfFmat = *Plasmodium falciparum* Fixed matrix; PfFSmat = *Plasmodium falciparum* Fixed Scaled matrix. The first column of the table represents the clustering % at which the matrices (represented in the subsequent columns along the first row) were calculated. Columns 2-5 represent the alignment scores obtained for each matrix series at different clustering percentages. The values in the closed brackets are the amino acid overlap for the alignment.

\* The highest obtained scores for the respective columns

† The score for the best performing matrix series

**Table S3. Alignment scores for the FASTA local pairwise alignment of *Plasmodium falciparum* hypothetical protein, PFB0090C and human DnaJ protein, Q9UDY4, with the PfSSM series of matrices**

| Clustering % | Smat         | SSmat        | PfFmat       | PfFSmat                   |
|--------------|--------------|--------------|--------------|---------------------------|
| 50           | 428.6* (339) | 479.5 (339)  | 239.1 (346)  | 806.0 (343)               |
| 60           | 288.2 (348)  | 477.2 (339)  | 243.7* (346) | 810.0* <sup>†</sup> (343) |
| 70           | 287.6 (348)  | 476.6 (339)  | 239.6 (346)  | 806.0 (343)               |
| 80           | 295.2 (348)  | 484.2* (339) | 226.8 (346)  | 792.6 (343)               |
| 90           | 274.2 (348)  | 463.2 (339)  | 212.7 (346)  | 775.6 (340)               |

Smat = Symmetric matrix; SSmat = Symmetric Scaled matrix; PfFmat = *Plasmodium falciparum* Fixed matrix; PfFSmat = *Plasmodium falciparum* Fixed Scaled matrix. The first column of the table represents the clustering % at which the matrices (represented in the subsequent columns along the first row) were calculated. Columns 2-7 represent the alignment scores obtained for each matrix series at different clustering percentages. The values in the closed brackets are the amino acid overlap for the alignment.

\* The highest obtained scores for the respective columns

<sup>†</sup> The score for the best performing matrix series
